# Supplementary material
Source: PubMed Central journal article supplement (PMC4881845)
Supplement: NIHMS787995-supplement-2.pdf [file NIHMS787995-supplement-2.pdf]

## Evaluation of the International Prognostic Score (IPS-7) and a Simpler Prognostic Score (IPS-3) for Advanced Hodgkin Lymphoma in the Modern Era

|                               |                                                                                                                                                                                                                                                                                                                                                                                                                                                                                                                                                                                                                                                                                                                                                                                                                                                                                                                                                                                                                                                                                                                                                                                                                                                                                                                                                                                                                                                                                                                                                                                                                                                                                                                                                                                                                                                    |
|-------------------------------|----------------------------------------------------------------------------------------------------------------------------------------------------------------------------------------------------------------------------------------------------------------------------------------------------------------------------------------------------------------------------------------------------------------------------------------------------------------------------------------------------------------------------------------------------------------------------------------------------------------------------------------------------------------------------------------------------------------------------------------------------------------------------------------------------------------------------------------------------------------------------------------------------------------------------------------------------------------------------------------------------------------------------------------------------------------------------------------------------------------------------------------------------------------------------------------------------------------------------------------------------------------------------------------------------------------------------------------------------------------------------------------------------------------------------------------------------------------------------------------------------------------------------------------------------------------------------------------------------------------------------------------------------------------------------------------------------------------------------------------------------------------------------------------------------------------------------------------------------|
| Journal:                      | <i>British Journal of Haematology</i>                                                                                                                                                                                                                                                                                                                                                                                                                                                                                                                                                                                                                                                                                                                                                                                                                                                                                                                                                                                                                                                                                                                                                                                                                                                                                                                                                                                                                                                                                                                                                                                                                                                                                                                                                                                                              |
| Manuscript ID:                | Draft                                                                                                                                                                                                                                                                                                                                                                                                                                                                                                                                                                                                                                                                                                                                                                                                                                                                                                                                                                                                                                                                                                                                                                                                                                                                                                                                                                                                                                                                                                                                                                                                                                                                                                                                                                                                                                              |
| Manuscript Type:              | Ordinary Papers                                                                                                                                                                                                                                                                                                                                                                                                                                                                                                                                                                                                                                                                                                                                                                                                                                                                                                                                                                                                                                                                                                                                                                                                                                                                                                                                                                                                                                                                                                                                                                                                                                                                                                                                                                                                                                    |
| Date Submitted by the Author: | n/a                                                                                                                                                                                                                                                                                                                                                                                                                                                                                                                                                                                                                                                                                                                                                                                                                                                                                                                                                                                                                                                                                                                                                                                                                                                                                                                                                                                                                                                                                                                                                                                                                                                                                                                                                                                                                                                |
| Complete List of Authors:     | <p>Diefenbach, Catherine; NYU Langone School of Medicine, NYU Perlmutter Cancer Center<br/>           Li, Hailun; Dana Farber Cancer Institute,, Statistics<br/>           Hong, Fangxin; Dana-Farber Cancer Institute, Biostatistics<br/>           Gordon, Leo; Robert H Lurie Comprehensive Cancer Center of Northwestern University, Hematology-Oncology<br/>           Fisher, Richard; Temple School of Medicine, Fox Chase Cancer Center<br/>           Bartlett, Nancy; Washington University, Division of Hematology/Oncology<br/>           Crump, Michael; University Health Network, Division of Medical Oncology and Hematology<br/>           Gascoyne, Randy; British Columbia Cancer Agency and the BC Cancer Research Centre, Center for Lymphoid Cancer<br/>           Wagner, Henry; Pennsylvania State Cancer Institute, Radiation Oncology<br/>           Stiff, Patrick; Loyola University Medical Center, Medical Oncology<br/>           Cheson, Bruce; Georgetown University Hospital, Hematology-Oncology<br/>           Stewart, Douglas; Tom Baker Cancer Centre, Hematology-Oncology<br/>           Kahl, Brad; University of Wisconsin, Medicine<br/>           Friedberg, Jonathan; James P. Wilmot Cancer Center, University of Rochester, 601 Elmwood Ave, Box 704, Rochester, NY, 14642, USA, University of Rochester<br/>           Blum, Kristie; The Ohio State University, Division of Hematology Oncology<br/>           Habermann, Thomas; Mayo Clinic, Div. Hematology<br/>           Tuscano, Joseph; University of California, Davis Cancer Center<br/>           Advani, Ranjana; Stanford University School of Medicine, Medicine<br/>           Hoppe, Richard; Stanford University, Radiation Oncology<br/>           Horning, Sandra; Genentech Inc., Global Head Clinical Hematology Oncology</p> |
| Key Words:                    | Hodgkin lymphoma, IPS, Prognostic score, ABVD, Stanford V                                                                                                                                                                                                                                                                                                                                                                                                                                                                                                                                                                                                                                                                                                                                                                                                                                                                                                                                                                                                                                                                                                                                                                                                                                                                                                                                                                                                                                                                                                                                                                                                                                                                                                                                                                                          |

1  
2  
3  
4  
5  
6  
7  
8  
9  
10  
11  
12  
13  
14  
15  
16  
17  
18  
19  
20  
21  
22  
23  
24  
25  
26  
27  
28  
29  
30  
31  
32  
33  
34  
35  
36  
37  
38  
39  
40  
41  
42  
43  
44  
45  
46  
47  
48  
49  
50  
51  
52  
53  
54  
55  
56  
57  
58  
59  
60

For Peer Review

# Evaluation of the International Prognostic Score (IPS-7) and a Simpler Prognostic Score (IPS-3) for Advanced Hodgkin Lymphoma in the Modern Era

Short title for running head: A streamlined prognostic index for Hodgkin lymphoma (52 characters)

## Authors:

C. S. Diefenbach<sup>1</sup>, H. Li<sup>2</sup>, F. Hong<sup>2</sup>, L. I. Gordon<sup>3</sup>, R. I. Fisher<sup>4</sup>, N. L. Bartlett<sup>5</sup>, M. Crump<sup>6</sup>, R. D. Gascoyne<sup>7</sup>, H. Wagner, Jr.<sup>8</sup>, P. J. Stiff<sup>9</sup>, B. D. Cheson<sup>10</sup>, D. A. Stewart<sup>11</sup>, B. S. Kahl<sup>12</sup>, J. W. Friedberg<sup>13</sup>, K. A. Blum<sup>14</sup>, T. M. Habermann<sup>15</sup>, J. M. Tuscano<sup>16</sup>, R. T. Hoppe<sup>17</sup>, S. J. Horning<sup>18</sup>, R. H. Advani<sup>17</sup>

## Author Affiliations:

<sup>1</sup>New York University, New York, New York; <sup>2</sup>Dana Farber Cancer Institute, Boston, Massachusetts; <sup>3</sup>Robert H. Lurie Comprehensive Cancer Center of Northwestern University, Chicago Illinois; <sup>4</sup>Fox Chase Cancer Center, Philadelphia, Pennsylvania; <sup>5</sup>Washington University School of Medicine, St. Louis, Missouri; <sup>6</sup>Princess Margaret Cancer Centre, Toronto, Canada; <sup>7</sup>British Columbia Cancer Agency, Vancouver, Canada; <sup>8</sup>Penn State Cancer Institute, Hershey, Pennsylvania; <sup>9</sup>Loyola University Medical Center, Maywood, Illinois; <sup>10</sup>Georgetown University Hospital, Washington, District of Columbia; <sup>11</sup>Tom Baker Cancer Centre, Calgary, Canada; <sup>12</sup>University of Wisconsin, Madison, Wisconsin; <sup>13</sup>University of Rochester, Rochester, New York; <sup>14</sup>Ohio State University, Columbus, Ohio; <sup>15</sup>Mayo Clinic, Rochester, Minnesota; <sup>16</sup>University of California, Davis Cancer Center, Sacramento, California; <sup>17</sup>Stanford University, Stanford, California; <sup>18</sup>Genentech, Inc., South San Francisco, California

**Address correspondence:** Dr. Catherine Diefenbach; NYU Perlmutter Cancer Center, 240 East 38<sup>th</sup> Street, 19<sup>th</sup> Floor, New York, NY 10016. Phone: (212) 731-5670. Email: [catherine.diefenbach@nyumc.org](mailto:catherine.diefenbach@nyumc.org)

**Scientific section designation:** Research Paper

**Abstract word count:** 200 words

**MS Word count** words 2,688 words

**Figures/tables:** (3/2); **References:** 36

**Supplementary materials:** 1 supplementary figure, 3 supplementary tables

**KEY POINTS**

- **Analysis of 854 advanced HL patients treated on E2496 confirms that the IPS-7 has decreased prognostic discrimination in the contemporary era.**
- **A simpler prognostic score, the IPS-3, outperformed the IPS-7 and may provide a more accurate framework for risk prediction.**

**ABSTRACT**

The international prognostic score (IPS-7) is the most commonly used risk stratification tool for advanced Hodgkin lymphoma (HL), however recent studies suggest the IPS-7 is less discriminating due to improved outcomes with contemporary therapy. We evaluated the seven variables for IPS-7 recorded at study entry for 854 patients enrolled on E2496. Univariate and multivariate Cox models were used to assess their predictive ability for freedom from progression (FFP) and overall survival (OS). The IPS-7 remained prognostic however its predictive range has narrowed. On multivariate analysis 2 factors (age, stage) remained significant for FFP and 3 factors (age, stage, hemoglobin) for OS. An alternative prognostic index, the IPS-3, was constructed using age, stage, and hemoglobin, which provided 4 distinct risk groups [FFP ( $p=0.0001$ ) and OS ( $p<0.0001$ )]. IPS-3 outperformed the IPS-7 on risk prediction for both FFP and OS by model fit and discrimination criteria. Using reclassification calibration 18% of IPS-7 low risk patients were re-classified as intermediate risk and 13% of IPS-7 intermediate risk patients as low risk. For patients with advanced HL, the IPS-3 may provide a simpler and more accurate framework for risk assessment in the modern era. Validation of these findings in other large data sets is planned.

**KEYWORDS**

Hodgkin lymphoma, IPS, prognostic score, ABVD, Stanford V

## INTRODUCTION

Hodgkin lymphoma (HL) is the most common lymphoid neoplasm in young patients, with a median age at diagnosis of 38 years, and approximately 40% of patients under age 35<sup>1</sup>. In the current era, more than 75% of patients are cured with contemporary frontline therapy<sup>2-5</sup>. Despite this success, patients with primary refractory disease or those who relapse after salvage strategies continue to have poor outcomes<sup>6</sup>. The most widely utilized clinical index to assign upfront risk in HL is the International Prognostic Score (IPS), a retrospectively developed clinical model with a primary endpoint of freedom from progression (FFP)<sup>7</sup>. The IPS was constructed in 1998 based on outcomes from approximately 4,600 patients treated on protocols for advanced stage HL prior to 1992. Complete data were available on 1,600 of these patients, and were used to fit the final Cox model. While the majority of patients had advanced stage (45% stage III, 43% stage IV), approximately 13% of patients were classified as stage I or II, and 22% had bulky mediastinal presentation. Therapy was variable and while the majority of patients (75%) were treated with at least 4 cycles of doxorubicin containing chemotherapy, 20% received mechlorethamine, oncovin, procarbazine, and prednisone (MOPP) or a similar regimen, which have been proved to be inferior to ABVD or other doxorubicin-containing regimens. Seven clinical parameters determined to be significant on multivariate analysis were independently associated with adverse clinical outcome; male sex, age>45 years, stage IV disease, hemoglobin <10.5g/dl, white blood count (wbc)  $\geq 15 \times 10^9/L$ , lymphocyte count <  $0.6 \times 10^9/L$  or <8% of total WBC, and albumin < 40g/L. On the basis of the number of factors present at diagnosis the IPS identified 6 subgroups of patients with 5 year FFP ranging from 42% to 84%, and overall survival (OS) of 56%-89%<sup>7</sup>.

Since the development of the IPS, there have been considerable improvements in therapy and supportive care in both the front line and relapsed setting, resulting in significant improvement in

1  
2  
3 outcome<sup>8-11</sup>. Additionally newer imaging modalities i.e. PET/CT may allow for more precise  
4  
5 staging and response assessment during treatment<sup>12-16</sup>.  
6  
7

8  
9 Although the IPS continues to be widely used, its utility for patients treated with contemporary  
10 regimens has been challenged. A retrospective analysis from British Columbia Cancer Agency  
11 (BCCA) in patients treated between 1980 and 2010 with ABVD, or an equivalent regimen  
12 reported an improvement in outcome and a diminished predictive range of the IPS-7 with FFP  
13 ranging from 62% to 88% and OS ranging from 67% to 98%<sup>17</sup>. To assess the utility of the  
14 individual IPS-7 factors in the contemporary era we analyzed data from a prospective phase III  
15 randomized trial ECOG 2496, a study that evaluated ABVD versus Stanford V in advanced HL<sup>2</sup>.  
16  
17  
18  
19  
20  
21  
22  
23

## 24 PATIENTS AND METHODS

### 25 Patient Population

26  
27  
28  
29  
30  
31  
32  
33  
34  
35  
36  
37  
38  
39  
40  
41  
42  
43  
44  
45  
46  
47  
48  
49  
50  
51  
52  
53  
54  
55  
56  
57  
58  
59  
60  
61  
62  
63  
64  
65  
66  
67  
68  
69  
70  
71  
72  
73  
74  
75  
76  
77  
78  
79  
80  
81  
82  
83  
84  
85  
86  
87  
88  
89  
90  
91  
92  
93  
94  
95  
96  
97  
98  
99  
100  
101  
102  
103  
104  
105  
106  
107  
108  
109  
110  
111  
112  
113  
114  
115  
116  
117  
118  
119  
120  
121  
122  
123  
124  
125  
126  
127  
128  
129  
130  
131  
132  
133  
134  
135  
136  
137  
138  
139  
140  
141  
142  
143  
144  
145  
146  
147  
148  
149  
150  
151  
152  
153  
154  
155  
156  
157  
158  
159  
160  
161  
162  
163  
164  
165  
166  
167  
168  
169  
170  
171  
172  
173  
174  
175  
176  
177  
178  
179  
180  
181  
182  
183  
184  
185  
186  
187  
188  
189  
190  
191  
192  
193  
194  
195  
196  
197  
198  
199  
200  
201  
202  
203  
204  
205  
206  
207  
208  
209  
210  
211  
212  
213  
214  
215  
216  
217  
218  
219  
220  
221  
222  
223  
224  
225  
226  
227  
228  
229  
230  
231  
232  
233  
234  
235  
236  
237  
238  
239  
240  
241  
242  
243  
244  
245  
246  
247  
248  
249  
250  
251  
252  
253  
254  
255  
256  
257  
258  
259  
260  
261  
262  
263  
264  
265  
266  
267  
268  
269  
270  
271  
272  
273  
274  
275  
276  
277  
278  
279  
280  
281  
282  
283  
284  
285  
286  
287  
288  
289  
290  
291  
292  
293  
294  
295  
296  
297  
298  
299  
300  
301  
302  
303  
304  
305  
306  
307  
308  
309  
310  
311  
312  
313  
314  
315  
316  
317  
318  
319  
320  
321  
322  
323  
324  
325  
326  
327  
328  
329  
330  
331  
332  
333  
334  
335  
336  
337  
338  
339  
340  
341  
342  
343  
344  
345  
346  
347  
348  
349  
350  
351  
352  
353  
354  
355  
356  
357  
358  
359  
360  
361  
362  
363  
364  
365  
366  
367  
368  
369  
370  
371  
372  
373  
374  
375  
376  
377  
378  
379  
380  
381  
382  
383  
384  
385  
386  
387  
388  
389  
390  
391  
392  
393  
394  
395  
396  
397  
398  
399  
400  
401  
402  
403  
404  
405  
406  
407  
408  
409  
410  
411  
412  
413  
414  
415  
416  
417  
418  
419  
420  
421  
422  
423  
424  
425  
426  
427  
428  
429  
430  
431  
432  
433  
434  
435  
436  
437  
438  
439  
440  
441  
442  
443  
444  
445  
446  
447  
448  
449  
450  
451  
452  
453  
454  
455  
456  
457  
458  
459  
460  
461  
462  
463  
464  
465  
466  
467  
468  
469  
470  
471  
472  
473  
474  
475  
476  
477  
478  
479  
480  
481  
482  
483  
484  
485  
486  
487  
488  
489  
490  
491  
492  
493  
494  
495  
496  
497  
498  
499  
500  
501  
502  
503  
504  
505  
506  
507  
508  
509  
510  
511  
512  
513  
514  
515  
516  
517  
518  
519  
520  
521  
522  
523  
524  
525  
526  
527  
528  
529  
530  
531  
532  
533  
534  
535  
536  
537  
538  
539  
540  
541  
542  
543  
544  
545  
546  
547  
548  
549  
550  
551  
552  
553  
554  
555  
556  
557  
558  
559  
560  
561  
562  
563  
564  
565  
566  
567  
568  
569  
570  
571  
572  
573  
574  
575  
576  
577  
578  
579  
580  
581  
582  
583  
584  
585  
586  
587  
588  
589  
590  
591  
592  
593  
594  
595  
596  
597  
598  
599  
600  
601  
602  
603  
604  
605  
606  
607  
608  
609  
610  
611  
612  
613  
614  
615  
616  
617  
618  
619  
620  
621  
622  
623  
624  
625  
626  
627  
628  
629  
630  
631  
632  
633  
634  
635  
636  
637  
638  
639  
640  
641  
642  
643  
644  
645  
646  
647  
648  
649  
650  
651  
652  
653  
654  
655  
656  
657  
658  
659  
660  
661  
662  
663  
664  
665  
666  
667  
668  
669  
670  
671  
672  
673  
674  
675  
676  
677  
678  
679  
680  
681  
682  
683  
684  
685  
686  
687  
688  
689  
690  
691  
692  
693  
694  
695  
696  
697  
698  
699  
700  
701  
702  
703  
704  
705  
706  
707  
708  
709  
710  
711  
712  
713  
714  
715  
716  
717  
718  
719  
720  
721  
722  
723  
724  
725  
726  
727  
728  
729  
730  
731  
732  
733  
734  
735  
736  
737  
738  
739  
740  
741  
742  
743  
744  
745  
746  
747  
748  
749  
750  
751  
752  
753  
754  
755  
756  
757  
758  
759  
760  
761  
762  
763  
764  
765  
766  
767  
768  
769  
770  
771  
772  
773  
774  
775  
776  
777  
778  
779  
780  
781  
782  
783  
784  
785  
786  
787  
788  
789  
790  
791  
792  
793  
794  
795  
796  
797  
798  
799  
800  
801  
802  
803  
804  
805  
806  
807  
808  
809  
810  
811  
812  
813  
814  
815  
816  
817  
818  
819  
820  
821  
822  
823  
824  
825  
826  
827  
828  
829  
830  
831  
832  
833  
834  
835  
836  
837  
838  
839  
840  
841  
842  
843  
844  
845  
846  
847  
848  
849  
850  
851  
852  
853  
854  
855  
856  
857  
858  
859  
860  
861  
862  
863  
864  
865  
866  
867  
868  
869  
870  
871  
872  
873  
874  
875  
876  
877  
878  
879  
880  
881  
882  
883  
884  
885  
886  
887  
888  
889  
890  
891  
892  
893  
894  
895  
896  
897  
898  
899  
900  
901  
902  
903  
904  
905  
906  
907  
908  
909  
910  
911  
912  
913  
914  
915  
916  
917  
918  
919  
920  
921  
922  
923  
924  
925  
926  
927  
928  
929  
930  
931  
932  
933  
934  
935  
936  
937  
938  
939  
940  
941  
942  
943  
944  
945  
946  
947  
948  
949  
950  
951  
952  
953  
954  
955  
956  
957  
958  
959  
960  
961  
962  
963  
964  
965  
966  
967  
968  
969  
970  
971  
972  
973  
974  
975  
976  
977  
978  
979  
980  
981  
982  
983  
984  
985  
986  
987  
988  
989  
990  
991  
992  
993  
994  
995  
996  
997  
998  
999  
1000

Between 1996 and 2006, 854 patients were enrolled on the North American Intergroup trial E2496, a Randomized Phase III Trial of ABVD versus Stanford V in Locally Extensive and Advanced Stage Hodgkin Lymphoma<sup>2</sup>. As IPS was one of the stratification factors used in the trial, all 7 IPS variables were recorded at the time of study entry.

### 40 Statistical Analysis

41  
42  
43  
44  
45  
46  
47  
48  
49  
50  
51  
52  
53  
54  
55  
56  
57  
58  
59  
60  
61  
62  
63  
64  
65  
66  
67  
68  
69  
70  
71  
72  
73  
74  
75  
76  
77  
78  
79  
80  
81  
82  
83  
84  
85  
86  
87  
88  
89  
90  
91  
92  
93  
94  
95  
96  
97  
98  
99  
100  
101  
102  
103  
104  
105  
106  
107  
108  
109  
110  
111  
112  
113  
114  
115  
116  
117  
118  
119  
120  
121  
122  
123  
124  
125  
126  
127  
128  
129  
130  
131  
132  
133  
134  
135  
136  
137  
138  
139  
140  
141  
142  
143  
144  
145  
146  
147  
148  
149  
150  
151  
152  
153  
154  
155  
156  
157  
158  
159  
160  
161  
162  
163  
164  
165  
166  
167  
168  
169  
170  
171  
172  
173  
174  
175  
176  
177  
178  
179  
180  
181  
182  
183  
184  
185  
186  
187  
188  
189  
190  
191  
192  
193  
194  
195  
196  
197  
198  
199  
200  
201  
202  
203  
204  
205  
206  
207  
208  
209  
210  
211  
212  
213  
214  
215  
216  
217  
218  
219  
220  
221  
222  
223  
224  
225  
226  
227  
228  
229  
230  
231  
232  
233  
234  
235  
236  
237  
238  
239  
240  
241  
242  
243  
244  
245  
246  
247  
248  
249  
250  
251  
252  
253  
254  
255  
256  
257  
258  
259  
260  
261  
262  
263  
264  
265  
266  
267  
268  
269  
270  
271  
272  
273  
274  
275  
276  
277  
278  
279  
280  
281  
282  
283  
284  
285  
286  
287  
288  
289  
290  
291  
292  
293  
294  
295  
296  
297  
298  
299  
300  
301  
302  
303  
304  
305  
306  
307  
308  
309  
310  
311  
312  
313  
314  
315  
316  
317  
318  
319  
320  
321  
322  
323  
324  
325  
326  
327  
328  
329  
330  
331  
332  
333  
334  
335  
336  
337  
338  
339  
340  
341  
342  
343  
344  
345  
346  
347  
348  
349  
350  
351  
352  
353  
354  
355  
356  
357  
358  
359  
360  
361  
362  
363  
364  
365  
366  
367  
368  
369  
370  
371  
372  
373  
374  
375  
376  
377  
378  
379  
380  
381  
382  
383  
384  
385  
386  
387  
388  
389  
390  
391  
392  
393  
394  
395  
396  
397  
398  
399  
400  
401  
402  
403  
404  
405  
406  
407  
408  
409  
410  
411  
412  
413  
414  
415  
416  
417  
418  
419  
420  
421  
422  
423  
424  
425  
426  
427  
428  
429  
430  
431  
432  
433  
434  
435  
436  
437  
438  
439  
440  
441  
442  
443  
444  
445  
446  
447  
448  
449  
450  
451  
452  
453  
454  
455  
456  
457  
458  
459  
460  
461  
462  
463  
464  
465  
466  
467  
468  
469  
470  
471  
472  
473  
474  
475  
476  
477  
478  
479  
480  
481  
482  
483  
484  
485  
486  
487  
488  
489  
490  
491  
492  
493  
494  
495  
496  
497  
498  
499  
500  
501  
502  
503  
504  
505  
506  
507  
508  
509  
510  
511  
512  
513  
514  
515  
516  
517  
518  
519  
520  
521  
522  
523  
524  
525  
526  
527  
528  
529  
530  
531  
532  
533  
534  
535  
536  
537  
538  
539  
540  
541  
542  
543  
544  
545  
546  
547  
548  
549  
550  
551  
552  
553  
554  
555  
556  
557  
558  
559  
560  
561  
562  
563  
564  
565  
566  
567  
568  
569  
570  
571  
572  
573  
574  
575  
576  
577  
578  
579  
580  
581  
582  
583  
584  
585  
586  
587  
588  
589  
590  
591  
592  
593  
594  
595  
596  
597  
598  
599  
600  
601  
602  
603  
604  
605  
606  
607  
608  
609  
610  
611  
612  
613  
614  
615  
616  
617  
618  
619  
620  
621  
622  
623  
624  
625  
626  
627  
628  
629  
630  
631  
632  
633  
634  
635  
636  
637  
638  
639  
640  
641  
642  
643  
644  
645  
646  
647  
648  
649  
650  
651  
652  
653  
654  
655  
656  
657  
658  
659  
660  
661  
662  
663  
664  
665  
666  
667  
668  
669  
670  
671  
672  
673  
674  
675  
676  
677  
678  
679  
680  
681  
682  
683  
684  
685  
686  
687  
688  
689  
690  
691  
692  
693  
694  
695  
696  
697  
698  
699  
700  
701  
702  
703  
704  
705  
706  
707  
708  
709  
710  
711  
712  
713  
714  
715  
716  
717  
718  
719  
720  
721  
722  
723  
724  
725  
726  
727  
728  
729  
730  
731  
732  
733  
734  
735  
736  
737  
738  
739  
740  
741  
742  
743  
744  
745  
746  
747  
748  
749  
750  
751  
752  
753  
754  
755  
756  
757  
758  
759  
760  
761  
762  
763  
764  
765  
766  
767  
768  
769  
770  
771  
772  
773  
774  
775  
776  
777  
778  
779  
780  
781  
782  
783  
784  
785  
786  
787  
788  
789  
790  
791  
792  
793  
794  
795  
796  
797  
798  
799  
800  
801  
802  
803  
804  
805  
806  
807  
808  
809  
810  
811  
812  
813  
814  
815  
816  
817  
818  
819  
820  
821  
822  
823  
824  
825  
826  
827  
828  
829  
830  
831  
832  
833  
834  
835  
836  
837  
838  
839  
840  
841  
842  
843  
844  
845  
846  
847  
848  
849  
850  
851  
852  
853  
854  
855  
856  
857  
858  
859  
860  
861  
862  
863  
864  
865  
866  
867  
868  
869  
870  
871  
872  
873  
874  
875  
876  
877  
878  
879  
880  
881  
882  
883  
884  
885  
886  
887  
888  
889  
890  
891  
892  
893  
894  
895  
896  
897  
898  
899  
900  
901  
902  
903  
904  
905  
906  
907  
908  
909  
910  
911  
912  
913  
914  
915  
916  
917  
918  
919  
920  
921  
922  
923  
924  
925  
926  
927  
928  
929  
930  
931  
932  
933  
934  
935  
936  
937  
938  
939  
940  
941  
942  
943  
944  
945  
946  
947  
948  
949  
950  
951  
952  
953  
954  
955  
956  
957  
958  
959  
960  
961  
962  
963  
964  
965  
966  
967  
968  
969  
970  
971  
972  
973  
974  
975  
976  
977  
978  
979  
980  
981  
982  
983  
984  
985  
986  
987  
988  
989  
990  
991  
992  
993  
994  
995  
996  
997  
998  
999  
1000

FFP was defined as the time from study entry to disease progression or relapse; deaths that occurred during remission that were not preceded by disease progression/relapse were censored. OS was defined as the time from study entry to death from any cause. The Kaplan-Meier method and Cox proportional regression model were used to estimate failure rates, hazard ratios (HRs), and 95% CIs. Log-rank test was used to compare the survival distributions between groups<sup>18,19</sup>.

1  
2  
3 The prognostic ability of individual IPS factors was evaluated for FFP and OS in both univariate  
4 and multivariable Cox regression models. A new 3-factor prognostic score (IPS-3) was  
5 constructed utilizing factors that were significant in multivariate Cox models. Possible  
6 alternative cut-off points for the 3 selected factors were evaluated using Chi-square statistics.  
7 FFP and OS curves were used to classify patients into 3 risk groups low, intermediate, and high  
8 based on number of risk factors: 0-2, 3-4 and  $\geq 5$  factors for IPS-7; 0, 1-2 and 3 factors for IPS-  
9 3, respectively. The prognostic performance of IPS-7 and IPS-3 was evaluated using the global  
10 model fit criteria Akaike information criterion (AIC), concordance probability estimate (CPE), and  
11 time-dependent AUC (area under ROC curve) for both FFP and OS <sup>20,21</sup>. Lower AIC, higher  
12 CPE, and/or higher AUC indicated better concordance. The reclassification calibration method  
13 was used to cross-tabulate all risk groups by IPS-7 and IPS-3 <sup>22,23</sup>. Specifically, for cases that  
14 were re-classified to different risk group by IPS-3, the observed FFP and OS estimates were  
15 compared to survival rates predicted by IPS-7 and IPS-3 respectively. The primary analysis  
16 includes all randomized patients. An additional subset analysis was performed on patients with  
17 advanced stage III-IV. The analysis was performed using SAS 9.3 and R 3.0.3.

## 36 RESULTS

### 39 Patient Characteristics

42 Patient characteristics comparing E2496, original IPS report and the BCCA cohort are shown in  
43 Table S1. In E2496 most patients (62%) had stage III or IV disease and the remainder (37%)  
44 bulky stage I or II disease.

### 50 Evaluation of Outcome for E2496 Patients by IPS-7

53 As previously reported, there were no significant differences between the two arms (ABVD  
54 versus Stanford V) for failure free survival (FFS) and OS at a median follow-up of 6.4 years <sup>2</sup>.

1  
2  
3 The IPS-7 remained predictive for FFP ( $p=0.012$ ) and OS ( $p<.0001$ ) as shown in Figure 1a and  
4  
5 1b, however, the separation among IPS-7 groups has narrowed. For patients in both the  
6  
7 highest and lowest risk groups, Kaplan-Meier curves of FFP and OS largely overlap. Risk  
8  
9 prediction by IPS-7 in the E2496 cohort is similar to the BCC report, but differs from the original  
10  
11 report by Hasenclever (Table S2).  
12  
13

### 14 15 **Significance of Individual Seven Factors Used in IPS-7**

16  
17  
18 Table 1 summarizes the results of univariate and multivariate Cox regression assessing the  
19  
20 prognostic ability of the 7 individual IPS factors for both FFP and OS. On multivariate analysis,  
21  
22 two factors (hemoglobin level and stage) were significant in predicting FFP and three factors  
23  
24 (age, hemoglobin level, and stage) were significant for OS. Lymphocyte count was marginally  
25  
26 significant for FFP prediction in univariate analysis ( $p=0.08$ ), but lost its prognostic effect  
27  
28 ( $p=0.29$ ) when put together in the model adjusting for hemoglobin level and stage. A similar  
29  
30 observation was seen for albumin in predicting OS ( $p=0.04$  in univariate analysis and 0.31 in  
31  
32 multivariate analysis).  
33  
34  
35

### 36 37 **Evaluation of a Simpler 3 Factor Prognostic Score (IPS-3)**

38  
39 An alternative prognostic score (IPS-3) was constructed utilizing the variables that remained  
40  
41 significant for predicting FFP or OS on multivariate analysis (Table 1): age $\geq$ 45 years,  
42  
43 hemoglobin $<$ 10.5g/dl, and stage IV. More than half (56%) of the patients had none of these risk  
44  
45 factors, 32% of patients had 1 risk factor, and 10% 2 risk factors. Only 3% (23 patients) had all 3  
46  
47 risk factors. The IPS-3 was significant for both FFP ( $p=0.0001$ ) and OS ( $p<.0001$ ) and  
48  
49 separated patients into 4 distinct risk groups (Figures 1c and 1d). The five-year FFP by IPS-3  
50  
51 was 83%, 74%, 68%, and 63% and OS 95%, 85%, 75%, and 52% for patients with 0, 1, 2, and  
52  
53  
54 3 risk factors, respectively.  
55  
56  
57  
58  
59  
60



1  
2  
3 We also explored different cut-off values of age, stage, and hemoglobin: age 50 versus 55  
4 versus 60, stage III/IV versus stage I/II, and hemoglobin of < 10 g/dl versus <9.5 g/dl. Chi-  
5 square statistics and hazard ratio associated with different cut-off values are displayed in Table  
6 S2. The largest Chi-square statistics selected to refine the IPS-3 were age>55, stage III/IV, and  
7 hemoglobin <10.5 g/dl. The results comparing the two models (original versus refined IPS-3)  
8 did not show meaningful difference to support the alternative cut-offs. There were very little  
9 differences in CPE between the two models (0.58 versus 0.60 for FFP, and 0.65 versus 0.65 for  
10 OS). Therefore for further analysis the original cut-off points were used in IPS-3.  
11  
12  
13  
14  
15  
16  
17  
18  
19

### 20 21 **Subset Analysis in Patients with Advanced Stage Diseases**

22  
23  
24 To assess the utility of the IPS-7 and the IPS-3 in patients restricted to advanced disease (stage  
25 III-IV) we performed an additional subset analysis. Among the 529 (62%) patients in this  
26 category, IPS-7 was not significant for FFP [ $p=0.15$ , Figure S1 (a)], but remained highly  
27 prognostic for OS [ $p\leq 0.0001$ ; Figure S1 (b)]. For IPS-3 there is separation for FFP curves  
28 [Figure S1, (c)], however the difference is not statistically significant ( $p=0.11$ ). IPS-3 also  
29 remained highly prognostic for OS [ $p\leq 0.0001$ ; Figure S1 (d)].  
30  
31  
32  
33  
34  
35  
36  
37

### 38 **Comparison of IPS-3 to IPS-7**

39  
40  
41 The time-dependent AUC ranked IPS-3 higher than IPS-7 at all times for both FFP and OS  
42 (Figure 2a and 2b). IPS-3 was also ranked higher than IPS-7 using the global fit discriminatory  
43 measure (CPE), with 0.58 versus 0.55 for FFP, and 0.65 versus 0.59 for OS. These results  
44 suggest a better concordance between the observed data and IPS-3. Lower AIC was seen for  
45 IPS-3 than for IPS-7 (2375 versus 2381 for FFP, and 1313 versus 1336 for OS) again indicating  
46 better model fit with IPS-3 for both FFP and OS.  
47  
48  
49  
50  
51  
52  
53

54  
55 We also compared IPS-3 to IPS-7 using reclassification calibration methods. A total of 238  
56 (28%) patients were reclassified to different risk categories by IPS-3 vs IPS-7 (Table 2). Among  
57  
58  
59  
60

1  
2  
3 the IPS-7 low risk patients, 153 (18%) were reclassified as intermediate risk by IPS-3. Both FFP  
4 and OS were closer to the predicted survival rates made by IPS-3 than by IPS-7, suggesting  
5 that IPS-3 was more accurate for the reclassified 153 patients [Figure 3 (a1, a2)]. Similarly the  
6  
7  
8  
9  
10 IPS-3 reclassified 54 (13%) of IPS -7 intermediate risk patients as low risk [Figure 3 (b1, b2)],  
11  
12 with FFS and OS curves closer to the predicted survival rates made by IPS-3 than by IPS-7. A  
13  
14 very small number (n=28, 3%) of patients were reclassified from IPS-7 high risk to IPS-3  
15  
16 intermediate risk. For this latter group IPS-7 was a better predictor of FFP than IPS-3, however  
17  
18 there was no substantial difference in predicting OS, [Figure 3 (c1,c2)].  
19

## 20 21 22 **Discussion**

23  
24 Our analysis of data from E2496 shows that the IPS-7 remains prognostic in the contemporary  
25  
26 era, however the magnitude of the differences for both FFP and OS for the lowest and highest  
27  
28 risk patients have narrowed, and are consistent with the findings from the BCCA <sup>17</sup>. In our  
29  
30 dataset, only 2 of the original 7 factors used in the IPS-7 remain significant for FFP (age and  
31  
32 stage), and 3 factors for OS (age, stage, and hemoglobin). Based on this, a simpler prognostic  
33  
34 score the IPS-3 was constructed that identified 4 distinct risk groups based on 0,1,2, or 3 risk  
35  
36 factors, which provided risk-stratification for both FFP (p=0.0001) and OS (p<0.0001). As  
37  
38 compared to IPS-7, better global prognostic performance of IPS-3 was suggested by model fit  
39  
40 and discrimination criteria. In addition, IPS-3 reclassified 18% of IPS-7 low risk patients as  
41  
42 intermediate risk, and 13% of IPS-7 intermediate risk patients as low risk, with observed FFP  
43  
44 and OS rate estimates among reclassified patients closer to those predicted by the  
45  
46 corresponding IPS-3 category. In our data set, the number of patients in the highest risk group  
47  
48 were too few to draw any valid conclusions.  
49

50  
51  
52  
53 Our study population differs from original IPS-7 report with respect to stage at diagnosis. In the  
54  
55 latter study patients with early stage high-risk disease (stages I, II) comprised 13% of the patient  
56  
57 population, compared to 37% high-risk stage I and II patients in E2496. Thus to evaluate  
58  
59  
60

1  
2  
3 whether this discrepancy skewed outcomes towards more favorable outcomes with IPS-3 we  
4 performed an additional subset analysis restricted to the patients with advanced stage (III-IV)  
5 disease. While 4 distinct risk groups were noted the differences were not statistically significant  
6 for FFP ( $p=0.11$ ) and remained highly significant for OS ( $p\leq 0.0001$ ). This was also the case  
7 for IPS-7 in our study where differences in FFP were not significant ( $p=0.15$ ). This suggests  
8 that patients with a high IPS-3 or IPS-7 at diagnosis may have a worse outcome at relapse than  
9 patients with low risk scores.  
10  
11  
12  
13  
14  
15  
16  
17

18  
19 Therapeutic advances such as the replacement of MOPP chemotherapy with ABVD, use of  
20 autologous stem cell transplant at relapse, growth factors to support dose intensity, improved  
21 imaging modalities which allow for accurate staging, and increased diagnostic accuracy are  
22 some of the key reasons which have contributed to the improvement in patient outcomes in the  
23 contemporary era. Yet despite these advances, some patients continue to have extremely poor  
24 outcomes. Clinical prognostic factors incorporated within the IPS-7 reflect the interaction of the  
25 biologic heterogeneity of HL with treatment. In the original IPS-7 analyses all risk factors were  
26 equally weighted. In contrast in the contemporary era, only 3 of these risk factors remained  
27 significant and were used to construct IPS-3. Advanced age is well recognized in several  
28 studies to be associated with inferior outcome<sup>24-26</sup>. Elderly patients are not well represented in  
29 the original IPS-7, as only 9% of patients were older than 55 years, with none older than 65  
30 years<sup>7</sup>. By comparison, patients up to age 83 were included in E2496, and 157 (18%) of  
31 patients were older than 45 years. Assessing alternative age cutoffs did not appear to improve  
32 the predictive power of the IPS-3, as only a minority ( $n=12$ , 1%) of patients were included in the  
33 highest risk groups. Additionally age did not appear to affect the total chemotherapy dose  
34 received<sup>25</sup>. It is less clear why anemia conferred a higher risk factor for poor OS than other lab  
35 parameters such as low albumin, leukopenia, and lymphocytosis. The anemia may have  
36 correlated with poor overall fitness and/or poor marrow reserve. It is plausible that anemia may  
37  
38  
39  
40  
41  
42  
43  
44  
45  
46  
47  
48  
49  
50  
51  
52  
53  
54  
55  
56  
57  
58  
59  
60

1  
2  
3 be associated with adverse tumor biology, increased inflammatory cytokine production, and/or  
4  
5  
6  
7  
8  
9  
10  
11  
12  
13  
14  
15  
16  
17  
18  
19  
20  
21  
22  
23  
24  
25  
26  
27  
28  
29  
30  
31  
32  
33  
34  
35  
36  
37  
38  
39  
40  
41  
42  
43  
44  
45  
46  
47  
48  
49  
50  
51  
52  
53  
54  
55  
56  
57  
58  
59  
60

be associated with adverse tumor biology, increased inflammatory cytokine production, and/or macrophage infiltration. Clearly this warrants further investigation.

A potential limitation of our study is that the study patients in E2496 were treated with one of two chemotherapy regimens (ABVD or Stanford V), thus the question of whether the IPS-3 would be applicable to other current dose intense regimens such as escalated BEACOPP, or to novel therapies such as brentuximab vedotin remains to be studied. Another limitation is that despite the overall large sample size of our study, there were very few patients (n=23) who had all 3 IPS-3 risk factors. Therefore validation of the IPS-3 in other data sets is definitely required.

In a largely curable disease it is important to individualize therapy by accurately selecting patients based on risk factors at diagnosis. With the multiplicity of therapeutic options now available for HL, accurate assessment of risk based on outcomes expected with contemporary therapy is more important now than ever before. The distinction of 4 groups by IPS-3 has clinical significance as new therapeutic advances are required for high risk patients, while minimizing therapy to alter the spectrum of long-term therapy related toxicity becomes more important for the low risk patients. As therapeutic strategies evolve these alternative indices are increasingly necessary for patient identification and risk stratification for clinical trials that utilize risk-adapted treatment approaches. There is precedent to refine prognostic scores in other lymphomas as clinical outcomes have evolved with improved therapies as reflected by the revised IPI (R-IPI) in DLBCL, which redistributed the 5 IPI elements into 3 prognostic groups with 4 year OS ranging from 55% to 94%<sup>27</sup>, the elderly IPI (E-IPI) which used an age cut off of 70 years rather than the 60 years used in the IPI, and provided additional prognostic discrimination for elderly patients of low and low-intermediate risk<sup>28</sup>, the NCCN IPI in DLBCL<sup>29</sup>, and the Follicular Lymphoma International Prognostic Index-2 (FLIPI-2) which stratified patients into 3 quartiles based on low risk (0), intermediate risk (1-2), and high risk<sup>30</sup>.

1  
2  
3 Advances in of HL biology suggest the significance of the interaction of the HRS cell with its  
4 tumor microenvironment for clinical outcomes. Expression of CD68+ and CD163 by tumor-  
5 associated macrophages (TAMS) is correlated with inferior PFS and OS <sup>31-34</sup>. More recently,  
6 NanoString digital expression profiling described a 23-gene signature which identified a high risk  
7 subset of advanced stage HL patients <sup>35</sup>. Other novel prognostic indicators such as EBV  
8 expression and lymphocyte/monocyte ratio have also shown to have prognostic significance <sup>36</sup>.  
9 Moving forward, a truly comprehensive risk assesment platform must take these biologic  
10 features as well as clinical factors into account. Efforts to incorporate these advances into the  
11 IPS-3 are ongoing.  
12  
13  
14  
15  
16  
17  
18  
19  
20  
21  
22  
23  
24  
25  
26  
27  
28  
29  
30  
31  
32  
33  
34  
35  
36  
37  
38  
39  
40  
41  
42  
43  
44  
45  
46  
47  
48  
49  
50  
51  
52  
53  
54  
55  
56  
57  
58  
59  
60

**ACKNOWLEDGMENTS**

Supported in part by research funding from the American Cancer Society (MRS-14-052-01-LIB) CD

**Presented in part:** 9<sup>th</sup> International Hodgkin Lymphoma Symposium, Cologne 2013; American Society of Hematology Annual Meeting, 2013.

This study was coordinated by the ECOG-ACRIN Cancer Research Group (Robert L. Comis, MD and Mitchell D. Schnall, MD, PhD, Group Co-Chairs) and supported in part by Public Health Service CA21115, CA180820, CA180794, CA23318, CA66636, CA17145, CA13650, CA180790, CA21076, CA180799, CA180816, CA11083, CA27525, CA32102, CA46282, CA77440, CA77597, CA77658, CA31946, CA33601, CA77202 and from the National Cancer Institute, National Institutes of Health and the Department of Health and Human Services. Its content is solely the responsibility of the authors and does not necessarily represent the official views of the National Cancer Institute.

**AUTHORSHIP CONTRIBUTIONS**

CD, HL, FH, RA designed the research.

CD, HL, FH, RA performed the research.

LG, RF, NB, MC, RG, HW, PS, BC, DS, BK, JF, KB, TH, JT, RH, SH, RA collected data.

CD, HL, FH, RA analyzed and interpreted data

HL, FH performed statistical analysis

CD, HL, FH, RA wrote the manuscript.

All authors reviewed and approved the manuscript.

**DISCLOSURES OF CONFLICTS OF INTEREST:**

1  
2  
3 CD: no conflicts of interest to disclose  
4 HL: no conflicts of interest to disclose  
5 FH: no conflicts of interest to disclose  
6 LG: no conflicts of interest to disclose  
7 RF: no conflicts of interest to disclose  
8 NB: no conflicts of interest to disclose  
9 MC: no conflicts of interest to disclose  
10 RD: no conflicts of interest to disclose  
11 HW: no conflicts of interest to disclose  
12 PS: no conflicts of interest to disclose  
13 BC: no conflicts of interest to disclose  
14 DS: no conflicts of interest to disclose  
15 BK: no conflicts of interest to disclose  
16 JF: no conflicts of interest to disclose  
17 KB: no conflicts of interest to disclose  
18 TH: no conflicts of interest to disclose  
19 JT: no conflicts of interest to disclose  
20 RH: no conflicts of interest to disclose  
21 SH: no conflicts of interest to disclose  
22 RA: no conflicts of interest to disclose  
23  
24  
25  
26  
27  
28  
29  
30  
31  
32  
33  
34  
35  
36  
37  
38  
39  
40  
41  
42  
43  
44  
45  
46  
47  
48  
49  
50  
51  
52  
53  
54  
55  
56  
57  
58  
59  
60

Peer Review

## REFERENCES

1. Cancer facts and figures 2013. Atlanta GA: American Cancer Society, 2013.
2. Gordon LI, Hong F, Fisher RI, et al: Randomized phase III trial of ABVD versus Stanford V with or without radiation therapy in locally extensive and advanced-stage Hodgkin lymphoma: an intergroup study coordinated by the Eastern Cooperative Oncology Group (E2496). *J Clin Oncol* 31:684-91, 2013
3. Engert A, Haverkamp H, Kobe C, et al: Reduced-intensity chemotherapy and PET-guided radiotherapy in patients with advanced stage Hodgkin's lymphoma (HD15 trial): a randomised, open-label, phase 3 non-inferiority trial. *Lancet* 379:1791-9, 2012
4. Federico M, Luminari S, Iannitto E, et al: ABVD compared with BEACOPP compared with CEC for the initial treatment of patients with advanced Hodgkin's lymphoma: results from the HD2000 Gruppo Italiano per lo Studio dei Linfomi Trial. *J Clin Oncol* 27:805-11, 2009
5. Viviani S, Zinzani PL, Rambaldi A, et al: ABVD versus BEACOPP for Hodgkin's lymphoma when high-dose salvage is planned. *N Engl J Med* 365:203-12, 2011
6. Arai S, Fanale M, Devos S, et al: Defining a Hodgkin lymphoma population for novel therapeutics after relapse from autologous hematopoietic cell transplant. *Leuk Lymphoma*, 2013
7. Hasenclever D, Diehl V: A prognostic score for advanced Hodgkin's disease. International Prognostic Factors Project on Advanced Hodgkin's Disease. *N Engl J Med* 339:1506-14, 1998
8. Engert A, Plutschow A, Eich HT, et al: Reduced treatment intensity in patients with early-stage Hodgkin's lymphoma. *N Engl J Med* 363:640-52, 2010
9. Straus DJ, Portlock CS, Qin J, et al: Results of a prospective randomized clinical trial of doxorubicin, bleomycin, vinblastine, and dacarbazine (ABVD) followed by radiation therapy (RT) versus ABVD alone for stages I, II, and IIIA nonbulky Hodgkin disease. *Blood* 104:3483-9, 2004
10. Eich HT, Diehl V, Gorgen H, et al: Intensified chemotherapy and dose-reduced involved-field radiotherapy in patients with early unfavorable Hodgkin's lymphoma: final analysis of the German Hodgkin Study Group HD11 trial. *J Clin Oncol* 28:4199-206, 2010
11. Younes A, Gopal AK, Smith SE, et al: Results of a pivotal phase II study of brentuximab vedotin for patients with relapsed or refractory Hodgkin's lymphoma. *J Clin Oncol* 30:2183-9, 2012
12. Hutchings M, Mikhaeel NG, Fields PA, et al: Prognostic value of interim FDG-PET after two or three cycles of chemotherapy in Hodgkin lymphoma. *Ann Oncol* 16:1160-8, 2005
13. Gallamini A, Hutchings M, Rigacci L, et al: Early interim 2-[18F]fluoro-2-deoxy-D-glucose positron emission tomography is prognostically superior to international prognostic score in advanced-stage Hodgkin's lymphoma: a report from a joint Italian-Danish study. *J Clin Oncol* 25:3746-52, 2007
14. Biggi A, Gallamini A, Chauvie S, et al: International validation study for interim PET in ABVD-treated, advanced-stage Hodgkin lymphoma: interpretation criteria and concordance rate among reviewers. *J Nucl Med* 54:683-90, 2013
15. Cheson BD, Fisher RI, Barrington SF, et al: Recommendations for Initial Evaluation, Staging, and Response Assessment of Hodgkin and Non-Hodgkin Lymphoma: The Lugano Classification. *J Clin Oncol*, 2014
16. Barrington SF, Mikhaeel NG, Kostakoglu L, et al: Role of Imaging in the Staging and Response Assessment of Lymphoma: Consensus of the International Conference on Malignant Lymphomas Imaging Working Group. *J Clin Oncol*, 2014
17. Moccia AA, Donaldson J, Chhanabhai M, et al: International Prognostic Score in advanced-stage Hodgkin's lymphoma: altered utility in the modern era. *J Clin Oncol* 30:3383-8, 2012
18. Kaplan EL, Meier P. Nonparametric estimation from incomplete observations. *Journal of the American Statistical Association* 53: 457-481, 1958.



19. Cox, D. R.; Oakes, D. (1984). Analysis of Survival Data. New York: Chapman & Hall. ISBN 041224490X.
20. Akaike, H. (1974) A new look at the statistical model identification. IEEE Transactions on Automatic Control, 19, 716–723
21. Gonen, M. & Heller, G. (2005) Concordance probability and discriminative power of proportional hazards regression. Biometrika, 92, 965–970
22. Heagerty PJ, Zheng Y: Survival model predictive accuracy and ROC curves. Biometrics 61:92-105, 2005
23. Cook NR, Ridker PM: Advances in measuring the effect of individual predictors of cardiovascular risk: the role of reclassification measures. Ann Intern Med 150:795-802, 2009
24. Engert A, Ballova V, Haverkamp H, et al: Hodgkin's lymphoma in elderly patients: a comprehensive retrospective analysis from the German Hodgkin's Study Group. J Clin Oncol 23:5052-60, 2005
25. Evens AM, Hong F, Gordon LI, et al: The efficacy and tolerability of adriamycin, bleomycin, vinblastine, dacarbazine and Stanford V in older Hodgkin lymphoma patients: a comprehensive analysis from the North American intergroup trial E2496. Br J Haematol 161:76-86, 2013
26. Landgren O, Algernon C, Axdorph U, et al: Hodgkin's lymphoma in the elderly with special reference to type and intensity of chemotherapy in relation to prognosis. Haematologica 88:438-44, 2003
27. Sehn LH, Berry B, Chhanabhai M, et al: The revised International Prognostic Index (R-IPI) is a better predictor of outcome than the standard IPI for patients with diffuse large B-cell lymphoma treated with R-CHOP. Blood 109:1857-61, 2007
28. Advani RH, Chen H, Habermann TM, et al: Comparison of conventional prognostic indices in patients older than 60 years with diffuse large B-cell lymphoma treated with R-CHOP in the US Intergroup Study (ECOG 4494, CALGB 9793): consideration of age greater than 70 years in an elderly prognostic index (E-IPI). Br J Haematol 151:143-51, 2010
29. Zhou Z, Sehn LH, Rademaker AW, et al: An enhanced International Prognostic Index (NCCN-IPI) for patients with diffuse large B-cell lymphoma treated in the rituximab era. Blood 123:837-42, 2014
30. Federico M, Bellei M, Marcheselli L, et al: Follicular lymphoma international prognostic index 2: a new prognostic index for follicular lymphoma developed by the international follicular lymphoma prognostic factor project. J Clin Oncol 27:4555-62, 2009
31. Steidl C, Lee T, Shah SP, et al: Tumor-associated macrophages and survival in classic Hodgkin's lymphoma. The New England journal of medicine 362:875-85, 2010
32. Kamper P, Bendix K, Hamilton-Dutoit S, et al: Tumor-infiltrating macrophages correlate with adverse prognosis and Epstein-Barr virus status in classical Hodgkin's lymphoma. Haematologica 96:269-76, 2011
33. Tan KL, Scott DW, Hong F, et al: Tumor-associated macrophages predict inferior outcomes in classic Hodgkin lymphoma: a correlative study from the E2496 Intergroup trial. Blood 120:3280-7, 2012
34. Steidl C, Diepstra A, Lee T, et al: Gene expression profiling of microdissected Hodgkin Reed-Sternberg cells correlates with treatment outcome in classical Hodgkin lymphoma. Blood 120:3530-40, 2012
35. Scott DW, Chan FC, Hong F, et al: Gene expression-based model using formalin-fixed paraffin-embedded biopsies predicts overall survival in advanced-stage classical Hodgkin lymphoma. J Clin Oncol 31:692-700, 2013

1  
2  
3  
4  
5  
6  
7  
8  
9  
10  
11  
12  
13  
14  
15  
16  
17  
18  
19  
20  
21  
22  
23  
24  
25  
26  
27  
28  
29  
30  
31  
32  
33  
34  
35  
36  
37  
38  
39  
40  
41  
42  
43  
44  
45  
46  
47  
48  
49  
50  
51  
52  
53  
54  
55  
56  
57  
58  
59  
60

36. Kanakry JA, Li H, Gellert LL, et al: Plasma Epstein-Barr virus DNA predicts outcome in advanced Hodgkin lymphoma: correlative analysis from a large North American cooperative group trial. Blood 121:3547-53, 2013

For Peer Review

**Table 1: Individual IPS factors with FFP and OS by Univariate and Multivariate Analysis**

| IPS factor                                     | FFP                 |               |                       |              | OS                  |                   |                       |                   |
|------------------------------------------------|---------------------|---------------|-----------------------|--------------|---------------------|-------------------|-----------------------|-------------------|
|                                                | Univariate Analysis |               | Multivariate Analysis |              | Univariate Analysis |                   | Multivariate Analysis |                   |
|                                                | HR(95% CI)          | p-value       | HR(95% CI)            | p-value      | HR(95% CI)          | p-value           | HR(95% CI)            | p-value           |
| <b>Age≥45 years</b>                            | 1.3<br>(0.9-1.8)    | 0.15          | 1.2 (0.9-1.8)         | 0.27         | 4.0<br>(2.7-5.9)    | <b>&lt;0.0001</b> | 3.7 (2.5-5.5)         | <b>&lt;0.0001</b> |
| Albumin<4g/dl                                  | 1.0<br>(0.7-1.4)    | 0.92          | 0.8 (0.6-1.1)         | 0.21         | 1.6<br>(1.0-2.5)    | <b>0.04</b>       | 1.3 (0.8-2.1)         | 0.31              |
| WBC≥15,000 mm <sup>3</sup>                     | 1.3<br>(0.9-2.0)    | 0.20          | 1.3 (0.8-1.9)         | 0.28         | 1.1<br>(0.7-2.0)    | 0.64              | 1.2 (0.7-2.1)         | 0.52              |
| <b>Hgb&lt;10.5g/dl</b>                         | 1.8<br>(1.3-2.6)    | <b>0.0003</b> | 1.7<br>(1.2-2.5)      | <b>0.004</b> | 2.8<br>(1.9-4.2)    | <b>&lt;0.0001</b> | 2.1 (1.3-3.3)         | <b>0.002</b>      |
| Lymph count <600 mm <sup>3</sup> or <8% of WBC | 1.3<br>(1.0-1.9)    | 0.08          | 1.2 (0.8-1.7)         | 0.29         | 1.2<br>(0.7-1.9)    | 0.48              | 1.0 (0.6-1.6)         | 0.91              |
| Male                                           | 1.1<br>(0.8-1.5)    | 0.55          | 1.1 (0.8-1.5)         | 0.55         | 1.1<br>(0.8-1.6)    | 0.57              | 1.1 (0.7-1.6)         | 0.68              |
| <b>Stage IV</b>                                | 1.7<br>(1.3-2.4)    | <b>0.0005</b> | 1.5 (1.1-2.1)         | <b>0.02</b>  | 2.3<br>(1.6-3.4)    | <b>&lt;0.0001</b> | 1.7<br>(1.1-2.5)      | <b>0.02</b>       |

\* Factors and numbers in bold indicate significant p-values in the analysis.

**Table 2: Reclassification: Number of Patients in Each Risk Category by IPS-7 and IPS-3**

|       |                         | IPS-7          |                         |                 |           |
|-------|-------------------------|----------------|-------------------------|-----------------|-----------|
|       |                         | Low Risk (0-2) | Intermediate Risk (3-4) | High Risk (5-7) | Total     |
| IPS-3 | Low Risk (0)            | 420            | <b>54</b>               | 0               | 474 (56%) |
|       | Intermediate Risk (1-2) | <b>153</b>     | 176                     | <b>28</b>       | 357 (42%) |
|       | High Risk (3)           | 0              | <b>3</b>                | 20              | 23 (3%)   |
|       | Total                   | 573 (67%)      | 233 (27%)               | 48 (6%)         | 854       |

\* Numbers in bold indicate patients who were reclassified.

For Peer Review

Figure 1: Freedom from progression (FFP) and overall survival (OS) according to the International Prognostic Score (IPS) factors (a, b) and the simpler prognostic index IPS-3 (c,d)

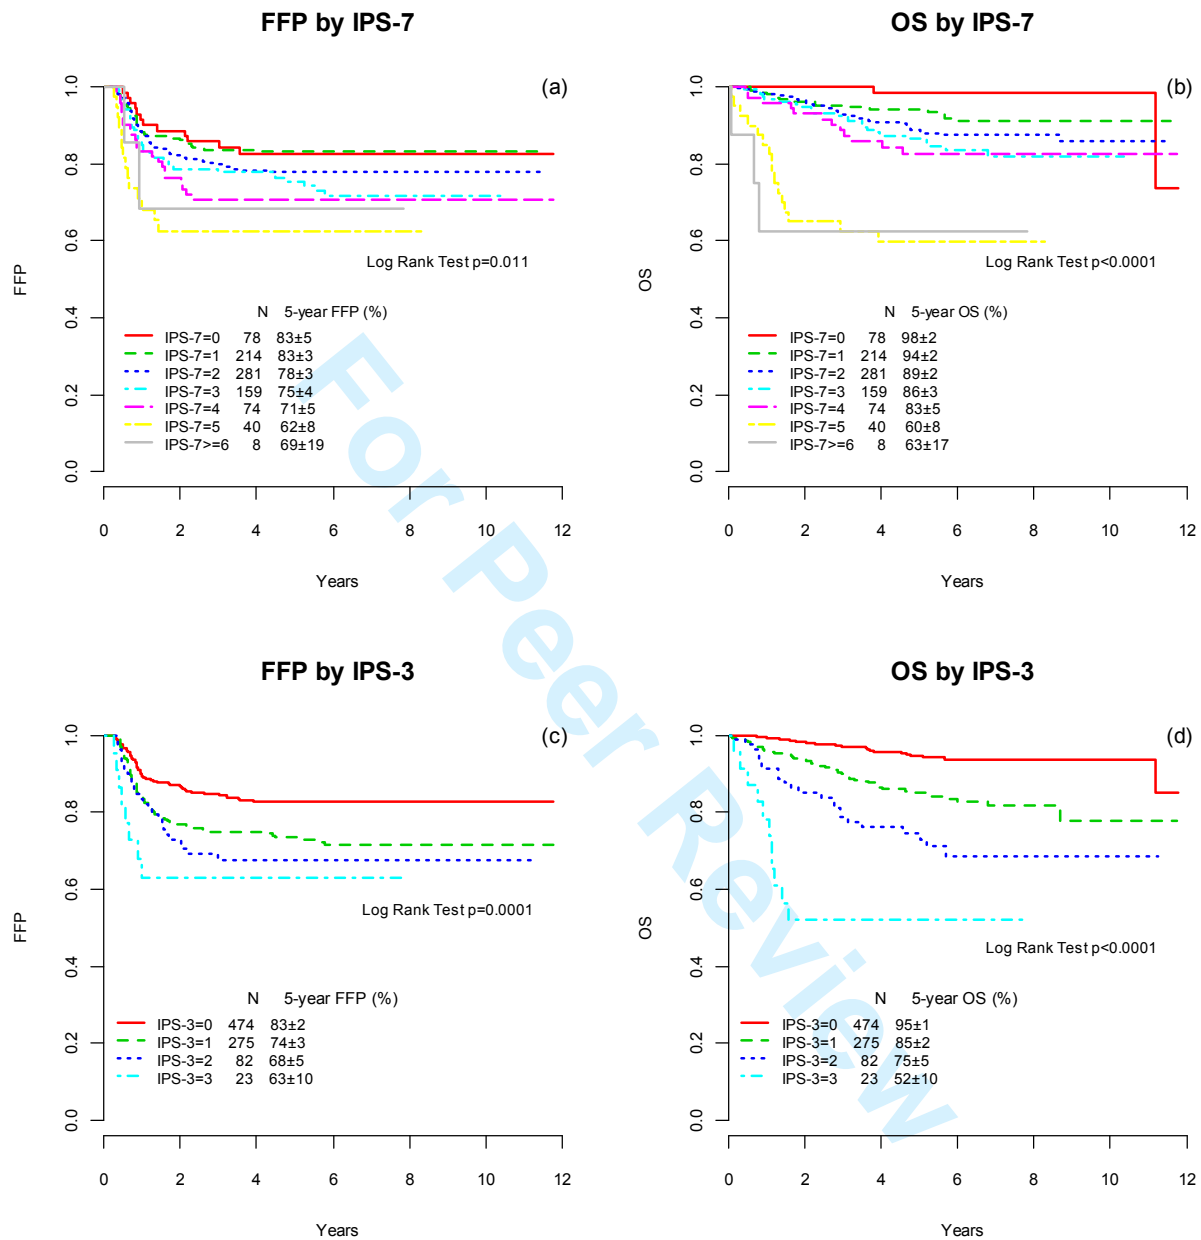

1  
2  
3  
4  
5  
6  
7  
8  
9  
10  
11  
12  
13  
14  
15  
16  
17  
18  
19  
20  
21  
22  
23  
24  
25  
26  
27  
28  
29  
30  
31  
32  
33  
34  
35  
36  
37  
38  
39  
40  
41  
42  
43  
44  
45  
46  
47  
48  
49  
50  
51  
52  
53  
54  
55  
56  
57  
58  
59  
60

Figure 2: Time weighted area under the receiver operator characteristics curves (AUC) for freedom-from progression (A) and overall survival (B) according to the International Prognostic Score factors IPS-7 and simpler prognostic index IPS-3.

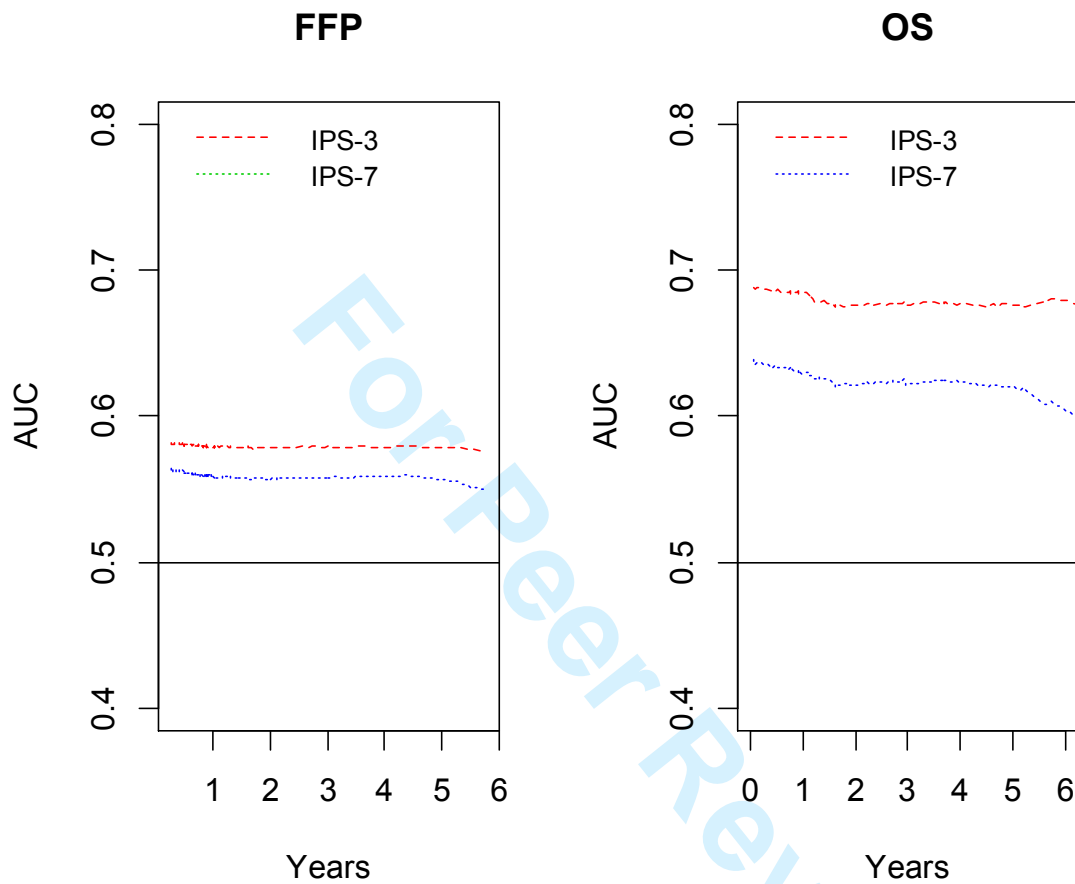

1  
2  
3  
4  
5  
6  
7  
8  
9  
10  
11  
12  
13  
14  
15  
16  
17  
18  
19  
20  
21  
22  
23  
24  
25  
26  
27  
28  
29  
30  
31  
32  
33  
34  
35  
36  
37  
38  
39  
40  
41  
42  
43  
44  
45  
46  
47  
48  
49  
50  
51  
52  
53  
54  
55  
56  
57  
58  
59  
60

**Figure 3: Kaplan-Meier (KM) analysis of observed and predicted (by IPS-7 and IPS-3) FFP and OS for patients whose risk categories were reclassified by IPS-3.** N=153 patients low risk by IPS-7 but intermediate risk by IPS-3 (a1, a2); n=54 patients intermediate risk by IPS-7 but low risk by IPS-3 (b1, b2); n=28 patients high risk by IPS-7 but intermediate risk by IPS-3 (c1,c2). The predicted survival rates were produced by univariate Cox models using IPS-3 and IPS-7 as covariates.

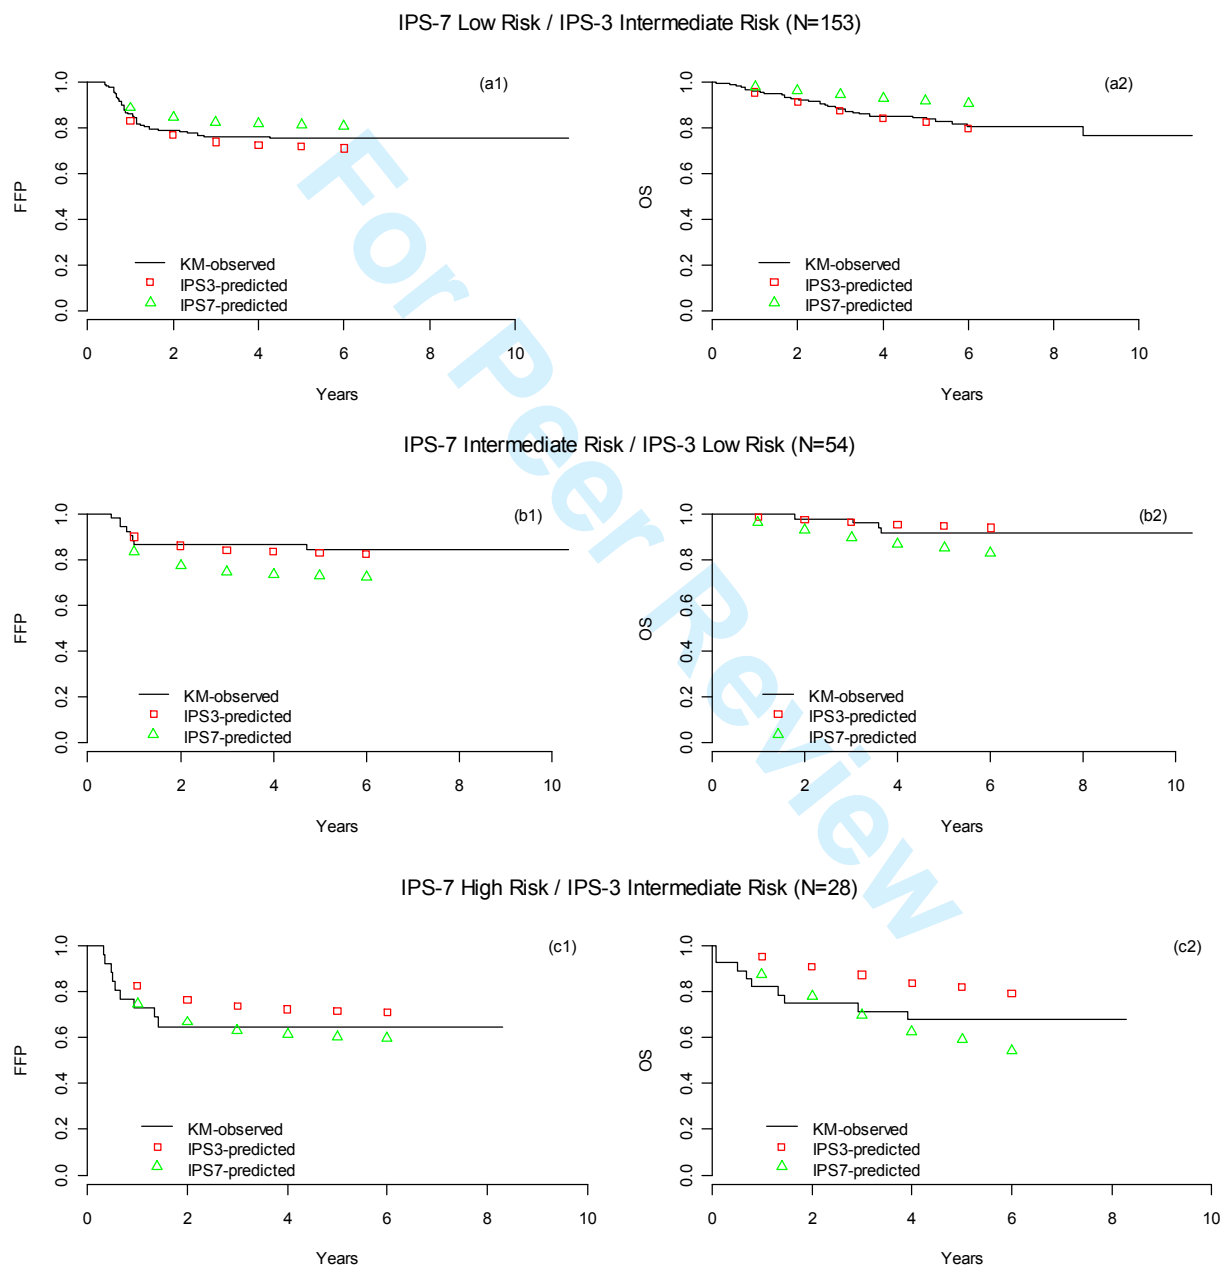

## Supplementary Tables

Table S1: Patient Characteristics Comparing the Three Studies

|                                                                    | E2496 |     | Original IPS Cohort |              | Vancouver Study Cohort |    |
|--------------------------------------------------------------------|-------|-----|---------------------|--------------|------------------------|----|
|                                                                    | N     | %   | N                   | %            | N                      | %  |
| Total N                                                            | 854   |     | 4695                |              | 740                    |    |
| Ann Arbor Stage                                                    |       |     |                     |              |                        |    |
| I or II                                                            | 314   | 37  | 603                 | 13           | 308                    | 42 |
| III                                                                | 321   | 38  | 2110                | 45           | 255                    | 35 |
| IV                                                                 | 208   | 25  | 1979                | 42           | 177                    | 24 |
| Histology                                                          |       |     |                     |              |                        |    |
| Nodular sclerosis                                                  | 591   | 72  | 2936                | 63           | 577                    | 78 |
| Mixed Cellularity                                                  | 89    | 11  | 1202                | 26           | 53                     | 7  |
| Lymphocyte-rich                                                    | 14    | 2   |                     |              | 9                      | 1  |
| Lymphocyte-depleted                                                | 3     | 0.4 | 124                 | 3            | 12                     | 2  |
| Lymphocyte predominant                                             | 16    | 2   | 162                 | 3            | 20                     | 3  |
| Classical HL, not further classifiable                             | 105   | 13  | 268                 | 6            | 69                     | 9  |
| Other                                                              | 5     | 0.6 | 0                   | 0            | 0                      | 0  |
| B symptoms                                                         | 481   | 57  | 3274                | 71           | 477                    | 64 |
| IPS Factors                                                        |       |     |                     |              |                        |    |
| Age $\geq$ 45 years                                                | 157   | 18  | 991                 | 21           | 196                    | 26 |
| Albumin < 4 g/dl                                                   | 566   | 66  | 1457                | 65           | 474                    | 64 |
| WBC $\geq$ 15,000/mm <sup>3</sup>                                  | 110   | 13  | Not reported        | Not reported | 114                    | 15 |
| Hemoglobin < 10.5 g/dl                                             | 145   | 17  | Not reported        | Not reported | 147                    | 20 |
| Lymphocyte count < 600/mm <sup>3</sup> or < 8% of white-cell count | 169   | 20  | Not reported        | 21           | 160                    | 22 |
| Male sex                                                           | 444   | 52  | 2882                | 61           | 403                    | 54 |
| Stage IV                                                           | 206   | 24  | 1979                | 42           | 177                    | 24 |
| IPS                                                                |       |     |                     |              |                        |    |
| 0                                                                  | 78    | 9   | 115                 | 7            | 57                     | 8  |
| 1                                                                  | 214   | 25  | 360                 | 22           | 195                    | 26 |
| 2                                                                  | 281   | 33  | 464                 | 29           | 195                    | 26 |
| 3                                                                  | 159   | 19  | 378                 | 23           | 155                    | 21 |
| 4                                                                  | 74    | 9   | 190                 | 12           | 88                     | 12 |
| $\geq$ 5                                                           | 48    | 6   | 111                 | 7            | 50                     | 7  |

\* Percentage was calculated among patients with the values available (excluding missing values).



**Table S2: Five-year FFP and OS by IPS**

| IPS | 5-year FFP |                        |                     | 5-year OS |                        |                     |
|-----|------------|------------------------|---------------------|-----------|------------------------|---------------------|
|     | E2496      | Vancouver Study Cohort | Original IPS Cohort | E2496     | Vancouver Study Cohort | Original IPS Cohort |
| 0   | 83 ± 5     | 88 ± 5                 | 84 ± 4              | 98 ± 2    | 98 ± 2                 | 89 ± 2              |
| 1   | 83 ± 3     | 84 ± 3                 | 77 ± 3              | 94 ± 2    | 97 ± 1                 | 90 ± 2              |
| 2   | 78 ± 3     | 80 ± 3                 | 67 ± 2              | 89 ± 2    | 91 ± 2                 | 81 ± 2              |
| 3   | 75 ± 4     | 74 ± 3                 | 60 ± 3              | 86 ± 3    | 88 ± 3                 | 78 ± 3              |
| 4   | 71 ± 5     | 67 ± 5                 | 51 ± 4              | 83 ± 5    | 85 ± 4                 | 61 ± 4              |
| ≥5  | 63 ± 7     | 62 ± 7                 | 42 ± 5              | 60 ± 7    | 67 ± 7                 | 56 ± 5              |
| 0-3 | 79 ± 2     | 81 ± 2                 | 70 ± 2              | 91 ± 1    | 93 ± 1                 | 83 ± 1              |
| ≥4  | 68 ± 4     | 65 ± 4                 | 47 ± 2              | 74 ± 4    | 78 ± 4                 | 59 ± 2              |

\* Plus - minus values are rate estimates ± SE (95 percent confidence intervals can be calculated as the rate estimates ± 1.96 × SE).

**Table S3. Cut-off Point Analysis of Factors Selected for PS-3**

|                      | N<br>(total=854) | FFP                              |                       | OS                               |                       |
|----------------------|------------------|----------------------------------|-----------------------|----------------------------------|-----------------------|
|                      |                  | Log-rank Chi-square<br>(p-value) | Hazard Ratio (95% CI) | Log-rank Chi-square<br>(p-value) | Hazard Ratio (95% CI) |
| <b>Age</b>           |                  |                                  |                       |                                  |                       |
| ≥45 vs. <45          | 161 vs. 693      | 1.69 (0.19)                      | 1.26 (0.89-1.80)      | 56.07 (<.0001)                   | 3.93 (2.67-5.78)      |
| ≥50 vs. <50          | 111 vs. 743      | 2.21 (0.14)                      | 1.36 (0.91-2.03)      | 88.22 (<.0001)                   | 5.37 (3.62-7.95)      |
| ≥55 vs. <55          | 74 vs. 780       | 3.27 (0.07)                      | 1.52 (0.96-2.39)      | 70.89 (<.0001)                   | 5.14 (3.36-7.86)      |
| ≥60 vs. <60          | 45 vs. 809       | 1.88 (0.17)                      | 1.48 (0.84-2.60)      | 52.98 (<.0001)                   | 5.10 (3.13-8.30)      |
| <b>Stage</b>         |                  |                                  |                       |                                  |                       |
| IV vs. other         | 206 vs. 648      | 12.58 (.0004)                    | 1.79 (1.29-2.49)      | 18.93 (<.0001)                   | 2.32 (1.57-3.43)      |
| III/IV vs. other     | 529 vs. 325      | 18.93 (<.0001)                   | 2.32 (1.16-2.58)      | 22.76 (<.0001)                   | 3.29 (1.96-5.54)      |
| <b>Hemoglobin</b>    |                  |                                  |                       |                                  |                       |
| <10.5 g/dl vs. other | 145 vs. 709      | 13.35 (.0003)                    | 1.85 (1.32-2.58)      | 26.40 (<.0001)                   | 2.78 (1.85-4.18)      |
| <10 g/dl vs. other   | 103 vs. 751      | 11.60 (.0007)                    | 1.89 (1.30-2.75)      | 11.01 (.0009)                    | 2.18 (1.36-3.49)      |
| <9.5 g/dl vs. other  | 82 vs. 772       | 7.32 (.007)                      | 1.76 (1.16-2.67)      | 9.76 (.002)                      | 2.20 (1.33-3.66)      |

Supplementary Figures

Figure S1. Kaplan-Meier curves of FFP and OS of the IPS-7 (a, b) and the PS-3 (c,d) among patients with advanced stage HL

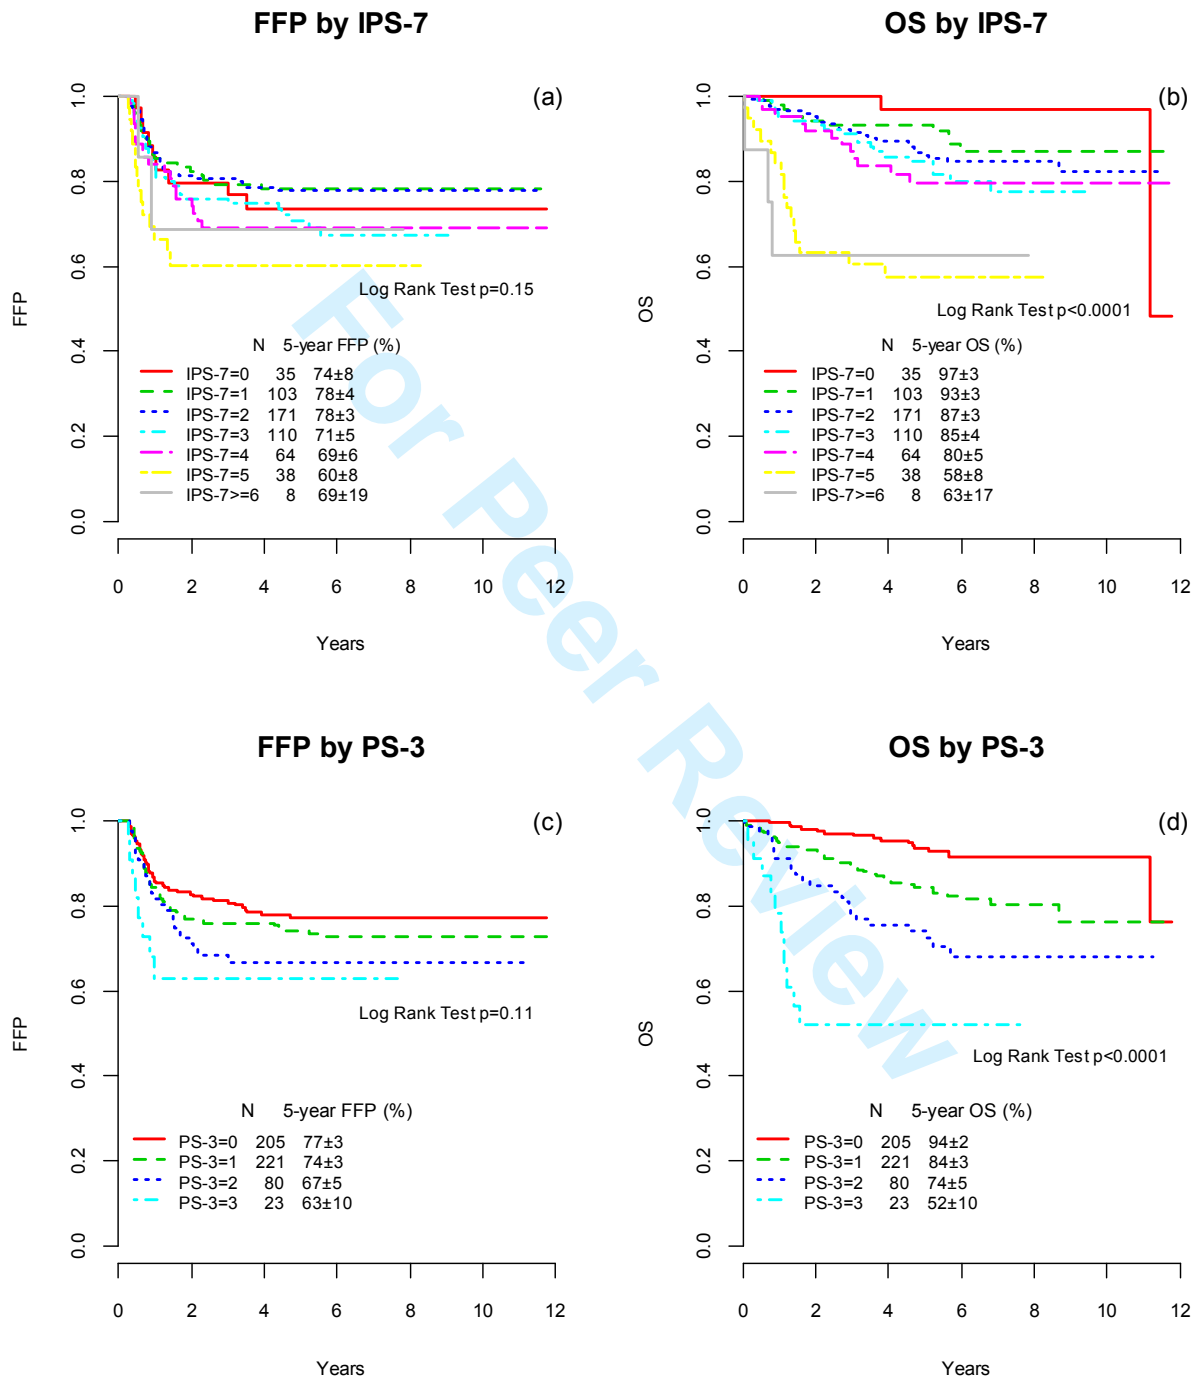

1  
2  
3  
4  
5  
6  
7  
8  
9  
10  
11  
12  
13  
14  
15  
16  
17  
18  
19  
20  
21  
22  
23  
24  
25  
26  
27  
28  
29  
30  
31  
32  
33  
34  
35  
36  
37  
38  
39  
40  
41  
42  
43  
44  
45  
46  
47  
48  
49  
50  
51  
52  
53  
54  
55  
56  
57  
58  
59  
60
